# Supplementary material for: Monocyte MRI Relaxation Rates Are Regulated by Extracellular Iron and Hepcidin
Source: MDPI journal article supplement (doi:10.3390/ijms24044036), 2023-02-17
Supplement: s1 [file s1]

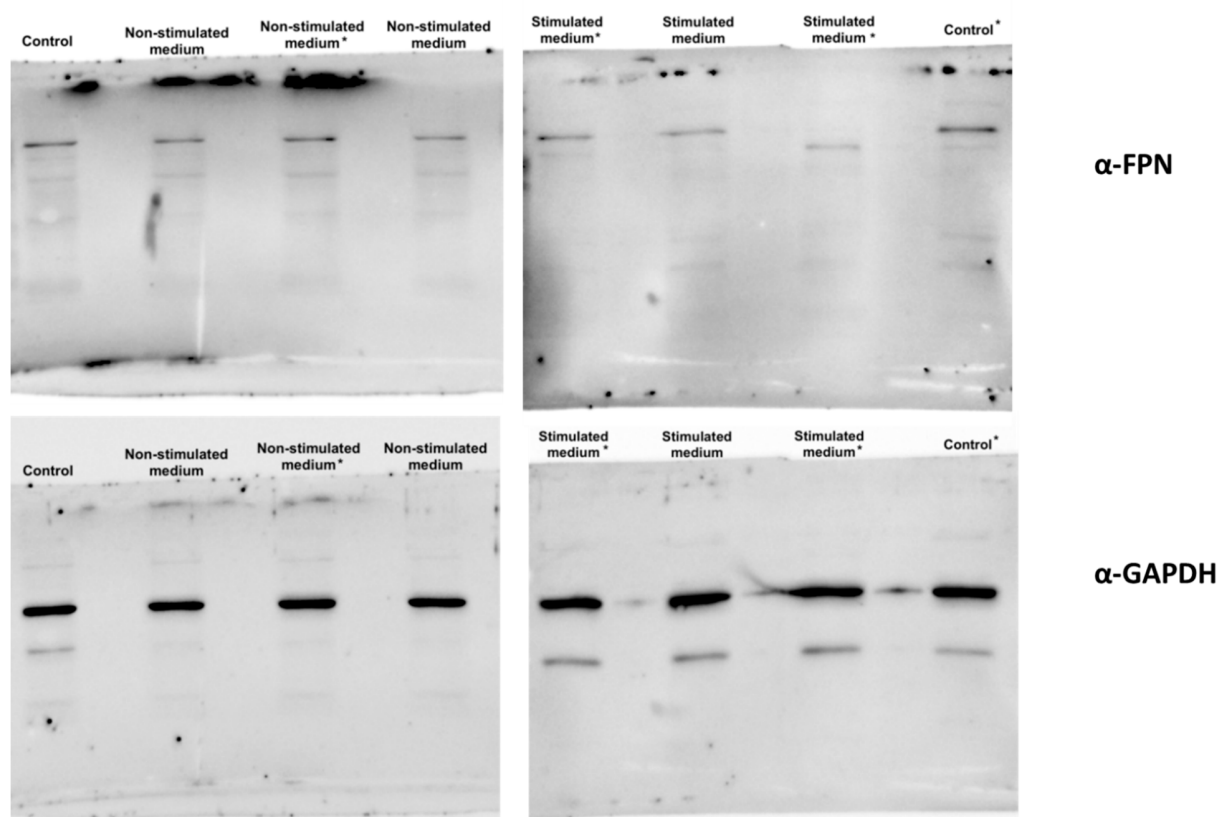

**Figure S1.** Regulation of ferroportin levels in monocytes by secreted hepcidin activity. THP-1 cells were cultured in the absence (–Fe, control medium) or presence of P19 cell-conditioned medium, either non-stimulated or stimulated to secrete hepcidin. Representative blots identify protein levels using antibodies to ferroportin ( $\alpha$ -FPN, upper panels) and glyceraldehyde-3-phosphate dehydrogenase ( $\alpha$ -GAPDH, lower panels). Representative samples included in Figure 2A are denoted with an asterisk (\*).
